# Supplementary material
Source: publisher site journal article supplement (https://www.dovepress.com/article/144108)
Supplement: Supplementary file 1 [file get_supplementary_file.php]

## Supplementary materials

**Table S1** GSK R&D or local GSK sponsored Phase II–IV randomized clinical trials included in the analysis

| Study name         | ClinicalTrials.gov identifier | Principal inclusion/exclusion criteria*                                                                                                                                                                                                                                                                                                                                                                                                                                                                                                                                                                                                                                                                                                                                                                                                                                        |
|--------------------|-------------------------------|--------------------------------------------------------------------------------------------------------------------------------------------------------------------------------------------------------------------------------------------------------------------------------------------------------------------------------------------------------------------------------------------------------------------------------------------------------------------------------------------------------------------------------------------------------------------------------------------------------------------------------------------------------------------------------------------------------------------------------------------------------------------------------------------------------------------------------------------------------------------------------|
| Japan-only studies |                               |                                                                                                                                                                                                                                                                                                                                                                                                                                                                                                                                                                                                                                                                                                                                                                                                                                                                                |
| SCO100646          | NCT00269126                   | Inclusion: Diagnosis of COPD; Both genders; Age 40–80 years.<br>Exclusion: Diagnosis of asthma or an uncontrolled medical condition or respiratory disorder other than COPD.                                                                                                                                                                                                                                                                                                                                                                                                                                                                                                                                                                                                                                                                                                   |
| SCO100648          | NCT00269087                   | Inclusion: Diagnosis of COPD; Both genders; Age 40–80 years.<br>Exclusion: Diagnosis of asthma or an uncontrolled medical condition or respiratory disorder other than COPD.                                                                                                                                                                                                                                                                                                                                                                                                                                                                                                                                                                                                                                                                                                   |
| HZC114156          | NCT01192191                   | Inclusion: Outpatient at least 40 years of age; Both genders (females of childbearing potential must be willing to use birth control method); Diagnosis of COPD at screening; Subjects with a current or prior history of at least 10 pack-years of cigarette smoking at screening; Post-bronchodilator FEV <sub>1</sub> /FVC ratio of less than 70%; Post-bronchodilator FEV <sub>1</sub> of less than 80%.<br>Exclusion: Current diagnosis of asthma; Respiratory disorders other than COPD; Upper or lower respiratory infection or exacerbation of COPD within 4 weeks prior to screening; Concurrent other disease that would confound study participation or affect subject safety; Allergies to study drugs, study drugs' excipients, medications related to study drugs; Taking another investigational medication or medication prohibited for use during this study. |

DB2115362

NCT01376388

Inclusion: Outpatient; A signed and dated written informed consent prior to study participation; Japanese subjects 40 years of age or older at screening; Male or female subjects (female subjects who have childbearing potential have a negative pregnancy test at screening, and agree to one of the acceptable contraceptive methods used consistently and correctly); Diagnosis of COPD; 10 pack-year or greater history of cigarette smoking.

Exclusion: Women who are pregnant or lactating or are planning on becoming pregnant during the study; A current diagnosis of asthma; Respiratory disorders other than COPD; Clinically significant non-respiratory diseases or abnormalities that are not adequately controlled; A chest X-ray or CT scan that reveals evidence of clinically significant abnormalities not believed to be due to the presence of COPD; A history of allergy or hypersensitivity to any anticholinergic/muscarinic receptor antagonist, beta<sub>2</sub>-agonist, lactose/milk protein or magnesium stearate or a medical condition; Hospitalization for COPD or pneumonia within 12 weeks prior to screening.

AC4115361

NCT01702363

Inclusion: Outpatient; A signed and dated written informed consent prior to study participation; Japanese subjects 40 years of age or older at Visit 1; Male or female subjects (a female is eligible if she is of: Non-childbearing potential or childbearing potential and agrees to one of the contraceptive methods); Subjects with a clinical history of COPD in accordance with the definition by COPD domestic guideline; Current or former cigarette smokers with a history of cigarette smoking of ≥10 pack-years at Visit 1.

Exclusion: Women who are pregnant or lactating or are planning on becoming pregnant during the study; A current diagnosis of asthma; Known respiratory disorders other than COPD; Subjects with historical or current evidence of clinically significant abnormalities that are uncontrolled; A chest X-ray or CT scan that reveals evidence of clinically significant abnormalities not believed to be due to the presence of COPD; Allergy or hypersensitivity to muscarinics, beta<sub>2</sub>-

|                                   |                          |                                                                                                                                                                                                                                                                                                                                                                                                                                                                                                                                                                                                                                                                                                                                                                                                                                                                                                                                                                                                                                                                                                                                                                                                                                                                                                                                                                                                                                                                                                                                                       |
|-----------------------------------|--------------------------|-------------------------------------------------------------------------------------------------------------------------------------------------------------------------------------------------------------------------------------------------------------------------------------------------------------------------------------------------------------------------------------------------------------------------------------------------------------------------------------------------------------------------------------------------------------------------------------------------------------------------------------------------------------------------------------------------------------------------------------------------------------------------------------------------------------------------------------------------------------------------------------------------------------------------------------------------------------------------------------------------------------------------------------------------------------------------------------------------------------------------------------------------------------------------------------------------------------------------------------------------------------------------------------------------------------------------------------------------------------------------------------------------------------------------------------------------------------------------------------------------------------------------------------------------------|
|                                   |                          | agonists, lactose/milk protein or magnesium stearate or a condition that contraindicates participation.                                                                                                                                                                                                                                                                                                                                                                                                                                                                                                                                                                                                                                                                                                                                                                                                                                                                                                                                                                                                                                                                                                                                                                                                                                                                                                                                                                                                                                               |
| SCO116571                         | NCT01607398 <sup>1</sup> | <p>Inclusion: Japanese (male or female) outpatients aged 40–80 years inclusive at Visit 1 (Female patients may be enrolled only if they are not of childbearing potential, or are of childbearing potential who agree to properly use protocol-specified contraceptive measures); Have a diagnosis of COPD (defined as per the COPD guideline); Have a FEV<sub>1</sub>/FVC ratio &lt;0.70 at 15–60 minutes following use of SALTANOL<sup>®</sup> inhaler; Have a FEV<sub>1</sub> of ≥40% to &lt;80% of the predicted normal value at 15–60 minutes following use of SALTANOL<sup>®</sup> inhaler; Current or ex-smokers with a smoking history of at least 10 pack-years; Able to use the DISKUS inhaler and the short-acting inhaled anticholinergic drug.</p> <p>Exclusion: Diagnosed by the investigator (or sub-investigator) as having bronchial asthma; Have any respiratory disorder other than COPD (eg, lung cancer, sarcoidosis, tuberculosis [including old tuberculosis], pulmonary fibrosis); Have a chest X-ray (or CT scan) indicating a diagnosis other than COPD that might interfere with assessments in the study (This must be assessed using last imaging study performed within 6 months prior to Visit 1, or, a chest X-ray must be obtained at Visit 1); Have chronic respiratory failure; Have undergone lung volume reduction and/or lung transplant; Have had a COPD exacerbation or respiratory infection requiring systemic corticosteroid or microbial therapy or hospitalization, within 6 weeks prior to Visit 1.</p> |
| SCO116717 (COSMOS-J) <sup>†</sup> | NCT01762800 <sup>2</sup> | <p>Inclusion: Male or female aged 40–80 years inclusive; Has an established clinical history of COPD (defined as per the GOLD definition); The subject achieves a grade of ≥1 on mMRC at Visit 1; A signed and dated written informed consent is obtained from the subject prior to study participation; The subject has a post-bronchodilator FEV<sub>1</sub> of ≥30% to ≤80% of predicted normal; The subject has a post-bronchodilator FEV<sub>1</sub>/FVC ratio &lt;70%.</p>                                                                                                                                                                                                                                                                                                                                                                                                                                                                                                                                                                                                                                                                                                                                                                                                                                                                                                                                                                                                                                                                      |

Exclusion: Has a predominant asthma (comorbid asthma is not an exclusion criterion); Has a medical diagnosis of narrow-angle glaucoma, prostatic hyperplasia, or bladder neck obstruction that in the opinion of the investigator should prevent them from entering the study (Note: As with other anticholinergic drugs, subjects with narrow-angle glaucoma, prostatic hyperplasia, or bladder neck obstruction should only be entered into the study at the investigator's discretion); Has known respiratory disorders other than COPD (eg, lung cancer, sarcoidosis, tuberculosis, or lung fibrosis); Has undergone lung surgery eg, lung transplant and/or lung volume reduction; Had a chest X-ray indicating diagnosis other than COPD that might interfere with the study (chest X-ray to be taken at Visit 1, if subject has not had one and/or CT image taken within 3 months of Visit 1); Requires regular (daily) or long term oxygen therapy (LTOT). (LTOT is defined as  $\geq 12$  hours oxygen use per day).

Multi-country studies

HZC112206

NCT01053988<sup>3</sup>

Inclusion: Outpatient; Subjects must give their signed and dated written informed consent to participate; Male or female subjects (A female is eligible to enter and participate in the study if she is of: Non-childbearing potential OR Childbearing potential, has a negative pregnancy test at screening, and agrees to one of the acceptable contraceptive methods defined in the protocol);  $\geq 40$  years of age at screening (Visit 1); Subjects with a clinical history of COPD in accordance with the definition by the American Thoracic Society/European Respiratory Society; Subjects with a current or prior history of  $\geq 10$  pack-years of cigarette smoking at screening (Visit 1).  
Exclusion: Women who are pregnant or lactating or are planning on becoming pregnant during the study; Subjects with a current diagnosis of asthma; Subjects with  $\alpha 1$ -antitrypsin deficiency as the underlying cause of COPD; Subjects with active tuberculosis, lung cancer, bronchiectasis, sarcoidosis, lung fibrosis, pulmonary

HZC112207

NCT01054885<sup>3</sup>

hypertension, interstitial lung diseases, or other active pulmonary diseases; Subjects with lung volume reduction surgery within the 12 months prior to screening (Visit 1); Subjects with a chest X-ray (or CT scan) that reveals evidence of clinically significant abnormalities not believed to be due to the presence of COPD.

Inclusion: Outpatient; Subjects must give their signed and dated written informed consent to participate; Male or female subjects (a female is eligible to enter and participate in the study if she is of: Non-childbearing potential OR Childbearing potential, has a negative pregnancy test at screening, and agrees to one of the acceptable contraceptive methods defined in the protocol);  $\geq 40$  years of age at screening (Visit 1); Subjects with a clinical history of COPD in accordance with the definition by the American Thoracic Society/European Respiratory Society;<sup>4</sup> Subjects with a current or prior history of  $\geq 10$  pack-years of cigarette smoking at screening (Visit 1).

Exclusion: Women who are pregnant or lactating or are planning on becoming pregnant during the study; Subjects with a current diagnosis of asthma; Subjects with  $\alpha 1$ -antitrypsin deficiency as the underlying cause of COPD; Subjects with active tuberculosis, lung cancer, bronchiectasis, sarcoidosis, lung fibrosis, pulmonary hypertension, interstitial lung diseases, or other active pulmonary diseases; Subjects with lung volume reduction surgery within the 12 months prior to screening (Visit 1); Subjects with a chest X-ray (or CT scan) that reveals evidence of clinically significant abnormalities not believed to be due to the presence of COPD.

DB2113361

NCT01313637<sup>4</sup>

Inclusion: Diagnosis of COPD; 10 pack-year or greater history of cigarette smoking; Post-bronchodilator  $FEV_1/FVC$  of  $< 0.7$ ; Predicted  $FEV_1$  of 70% of normal or less; mMRC dyspnea score of 2 or greater. Exclusion: Women who are pregnant, lactating, or planning to become pregnant; Respiratory disorders other than COPD, including a current diagnosis of asthma; Clinically significant non-respiratory

|           |                          |                                                                                                                                                                                                                                                                                                                                                                                                                                                                                                                                                                                                                                                                                                                                                                                                                                  |
|-----------|--------------------------|----------------------------------------------------------------------------------------------------------------------------------------------------------------------------------------------------------------------------------------------------------------------------------------------------------------------------------------------------------------------------------------------------------------------------------------------------------------------------------------------------------------------------------------------------------------------------------------------------------------------------------------------------------------------------------------------------------------------------------------------------------------------------------------------------------------------------------|
|           |                          | diseases or abnormalities that are not adequately controlled; Significant allergy or hypersensitivity to anticholinergics, beta <sub>2</sub> -agonists, or the excipients of magnesium stearate or lactose used in the inhaler delivery device; Hospitalization for COPD or pneumonia within 12 weeks prior to screening; Lung volume reduction surgery within 12 weeks prior to screening.                                                                                                                                                                                                                                                                                                                                                                                                                                      |
| DB2113373 | NCT01313650 <sup>5</sup> | Inclusion: Diagnosis of COPD; 10 pack-year or greater history of cigarette smoking; Post-bronchodilator FEV <sub>1</sub> /FVC of <0.7; Predicted FEV <sub>1</sub> of 70% of normal or less; mMRC dyspnea score of 2 or greater. Exclusion: Women who are pregnant, lactating, or planning to become pregnant; Respiratory disorders other than COPD, including a current diagnosis of asthma; Clinically significant non-respiratory diseases or abnormalities that are not adequately controlled; Significant allergy or hypersensitivity to anticholinergics, beta-agonist, or the excipients of magnesium stearate or lactose used in the inhaler delivery device; Hospitalization for COPD or pneumonia within 12 weeks prior to screening; Lung volume reduction surgery within 12 weeks prior to screening.                |
| AC4115408 | NCT01387230 <sup>6</sup> | Inclusion: Diagnosis of COPD; 10 pack-year or greater history of cigarette smoking; Post-bronchodilator FEV <sub>1</sub> /FVC of <0.7; Predicted FEV <sub>1</sub> of 70% of normal or less; mMRC dyspnea score of 2 or greater. Exclusion: Women who are pregnant, lactating, or planning to become pregnant; Respiratory disorders other than COPD, including a current diagnosis of asthma; Clinically significant non-respiratory diseases or abnormalities that are not adequately controlled; Significant allergy or hypersensitivity to anticholinergics, beta <sub>2</sub> -agonists, or the excipients of magnesium stearate or lactose used in the inhaler delivery device; Hospitalization for COPD or pneumonia within 12 weeks prior to screening; Lung volume reduction surgery within 12 weeks prior to screening. |

**Notes:** \*The first six inclusion and exclusion criteria, as cited on [clinicaltrials.gov](http://clinicaltrials.gov), are given (accessed February 2017); †Did not exclude patients with asthma overlap.

**Abbreviations:** COPD, chronic obstructive pulmonary disease; FEV<sub>1</sub>, forced expiratory volume in 1 second; FVC, forced vital capacity; CT, computed tomography; GOLD, Global Initiative for Chronic Obstructive Lung Disease; mMRC, modified Medical Research Council.

**References:**

1. Asai K, Kobayashi A, Makihara Y, Johnson M. *Int J Chron Obstruct Pulmon Dis*. 2015;10:803–811.
2. Betsuyaku T, Kato M, Fujimoto K, et al. *Int J Chron Obstruct Pulmon Dis*. 2013;8:453–459.
3. Svedsater H, Dale P, Garrill K, Walker R, Woepse MW. *BMC Pulm Med*. 2013;13:72.
4. Celli B, Crater G, Kilbride S, et al. *Chest*. 2014;145(5):981–991.
5. Donohue JF, Maleki-Yazdi MR, Kilbride S, Mehta R, Kalberg C, Church A. *Respir Med*. 2013;107(10):1538–1546.
6. Trivedi R, Richard N, Mehta R, Church A. *Eur Respir J*. 2014;43(1):72–81.

**Table S2** Patient demographics by percentage blood eosinophils

| Characteristic                           | All studies, Japanese patients |                    |                    | Multi-country studies,<br>non-Japanese patients |                      |                    |
|------------------------------------------|--------------------------------|--------------------|--------------------|-------------------------------------------------|----------------------|--------------------|
|                                          | <2% EOS<br>(N=402)             | ≥2% EOS<br>(N=902) | Total<br>(N=1,304) | <2% EOS<br>(N=2,218)                            | ≥2% EOS<br>(N=2,937) | Total<br>(N=5,155) |
| Age (years), n (%)                       |                                |                    |                    |                                                 |                      |                    |
| <65                                      | 97 (24)                        | 206 (23)           | 303 (23)           | 1,336 (60)                                      | 1,697 (58)           | 3,033 (59)         |
| ≥65                                      | 305 (76)                       | 696 (77)           | 1,001 (77)         | 882 (40)                                        | 1,240 (42)           | 2,122 (41)         |
| Male, n (%)                              | 377 (94)                       | 861 (95)           | 1,238 (95)         | 1,420 (64)                                      | 2,038 (69)           | 3,458 (67)         |
| GOLD stage, n (%)                        |                                |                    |                    |                                                 |                      |                    |
| n                                        | 393                            | 859                | 1,252 <sup>a</sup> | 2,205                                           | 2,927                | 5,132              |
| I: FEV <sub>1</sub> ≥80% predicted       | 2 (<1)                         | 2 (<1)             | 4 (<1)             | 1 (<1)                                          | 1 (<1)               | 2 (<1)             |
| II: 50%≤FEV <sub>1</sub> <80% predicted  | 224 (57)                       | 513 (60)           | 737 (59)           | 1,002 (45)                                      | 1,369 (47)           | 2,371 (46)         |
| III: 30%≤FEV <sub>1</sub> <50% predicted | 146 (37)                       | 317 (37)           | 463 (37)           | 985 (45)                                        | 1,279 (44)           | 2,264 (44)         |
| IV: FEV <sub>1</sub> <30% predicted      | 21 (5)                         | 27 (3)             | 48 (4)             | 217 (10)                                        | 278 (9)              | 495 (10)           |



SGRQ Total score

|           |               |               |                  |               |               |                    |
|-----------|---------------|---------------|------------------|---------------|---------------|--------------------|
| n         | 85            | 71            | 156 <sup>b</sup> | 1,344         | 1,561         | 2,905 <sup>b</sup> |
| Mean (SD) | 37.80 (16.66) | 41.25 (14.22) | 39.37 (15.64)    | 50.35 (17.61) | 47.70 (17.61) | 48.92 (17.66)      |

Number of patients with COPD  
exacerbations managed without  
oral/systemic corticosteroids and/or  
antibiotics (not involving  
hospitalization) in the past 12  
months, n (%)

|    |          |          |                  |          |            |                    |
|----|----------|----------|------------------|----------|------------|--------------------|
| n  | 227      | 520      | 747 <sup>c</sup> | 820      | 1,323      | 2,143 <sup>d</sup> |
| 0  | 222 (98) | 505 (97) | 727 (97)         | 728 (89) | 1,175 (89) | 1,903 (89)         |
| 1  | 5 (2)    | 15 (3)   | 20 (3)           | 80 (10)  | 129 (10)   | 209 (10)           |
| 2  | 0        | 0        | 0                | 11 (1)   | 14 (1)     | 25 (1)             |
| >2 | 0        | 0        | 0                | 1 (<1)   | 5 (<1)     | 6 (<1)             |

Number of patients with COPD  
exacerbations requiring

oral/systemic corticosteroids and/or  
antibiotics (not involving  
hospitalization) in the past 12

|               |          |          |                  |            |            |            |
|---------------|----------|----------|------------------|------------|------------|------------|
| months, n (%) | 313      | 591      | 904 <sup>e</sup> | 2,218      | 2,937      | 5,155      |
| n             | 274 (88) | 522 (88) | 796 (88)         | 1,662 (75) | 2,164 (74) | 3,826 (74) |
| 0             | 29 (9)   | 50 (8)   | 79 (9)           | 434 (20)   | 600 (20)   | 1,034 (20) |
| 1             | 7 (2)    | 13 (2)   | 20 (2)           | 84 (4)     | 115 (4)    | 199 (4)    |
| 2             | 3 (<1)   | 6 (1)    | 9 (<1)           | 38 (2)     | 58 (2)     | 96 (2)     |
| >2            |          |          |                  |            |            |            |

Number of patients with COPD  
exacerbations requiring  
hospitalization in the past 12

|               |          |          |                    |            |            |            |
|---------------|----------|----------|--------------------|------------|------------|------------|
| months, n (%) |          |          |                    |            |            |            |
| n             | 393      | 860      | 1,253 <sup>a</sup> | 2,218      | 2,937      | 5,155      |
| 0             | 375 (95) | 831 (97) | 1,206 (96)         | 2,003 (90) | 2,665 (91) | 4,668 (91) |
| 1             | 18 (5)   | 26 (3)   | 44 (4)             | 188 (8)    | 249 (8)    | 437 (8)    |

|    |   |        |        |        |         |         |
|----|---|--------|--------|--------|---------|---------|
| 2  | 0 | 3 (<1) | 3 (<1) | 23 (1) | 20 (<1) | 43 (<1) |
| >2 | 0 | 0      | 0      | 4 (<1) | 3 (<1)  | 7 (<1)  |

**Notes:** <sup>a</sup>Not available for study SCO116571; <sup>b</sup>Available for studies AC4115408, DB2113361, and DB2113373 only; <sup>c</sup>Available for studies AC4115361, DB2115362, HZC112206, HZC112207, HZC114156, and SCO116717 only; <sup>d</sup>Available for studies HZC112206 and HZC112207 only; <sup>e</sup>Not available for studies SCO100646, SCO100648, and SCO116571.

**Abbreviations:** EOS, eosinophil; GOLD, Global Initiative for Chronic Obstructive Lung Disease; FEV<sub>1</sub>, forced expiratory volume in 1 second; SGRQ, St George’s Respiratory Questionnaire; SD, standard deviation; COPD, chronic obstructive pulmonary disease.

**Table S3** Patient demographics in Japan studies by absolute eosinophils

| Japan studies                                                                                                                                                                        |                           |                           |                  |
|--------------------------------------------------------------------------------------------------------------------------------------------------------------------------------------|---------------------------|---------------------------|------------------|
| Characteristic                                                                                                                                                                       | <150cells/mm <sup>3</sup> | ≥150cells/mm <sup>3</sup> | Total            |
|                                                                                                                                                                                      | EOS                       | EOS                       | (N=848)          |
|                                                                                                                                                                                      | (N=343)                   | (N=505)                   |                  |
| Age (years), n (%)                                                                                                                                                                   |                           |                           |                  |
| <65                                                                                                                                                                                  | 68 (20)                   | 121 (24)                  | 189 (22)         |
| ≥65                                                                                                                                                                                  | 275 (80)                  | 384 (76)                  | 659 (78)         |
| Male, n (%)                                                                                                                                                                          | 321 (94)                  | 482 (95)                  | 803 (95)         |
| GOLD stage, n (%)                                                                                                                                                                    |                           |                           |                  |
| n                                                                                                                                                                                    | 329                       | 468                       | 797              |
| I: FEV <sub>1</sub> ≥80% predicted                                                                                                                                                   | 1 (<1)                    | 0                         | 1 (<1)           |
| II: 50%≤FEV <sub>1</sub> <80% predicted                                                                                                                                              | 173 (53)                  | 272 (58)                  | 445 (56)         |
| III: 30%≤FEV <sub>1</sub> <50% predicted                                                                                                                                             | 144 (44)                  | 180 (38)                  | 324 (41)         |
| IV: FEV <sub>1</sub> <30% predicted                                                                                                                                                  | 11 (3)                    | 16 (3)                    | 27 (3)           |
| Number of patients with COPD<br>exacerbations managed without<br>oral/systemic corticosteroids and/or<br>antibiotics (not involving hospitalization)<br>in the past 12 months, n (%) |                           |                           |                  |
| n                                                                                                                                                                                    | 177                       | 271                       | 448 <sup>a</sup> |
| 0                                                                                                                                                                                    | 175 (99)                  | 262 (97)                  | 437 (98)         |
| 1                                                                                                                                                                                    | 2 (1)                     | 9 (3)                     | 11 (2)           |
| 2                                                                                                                                                                                    | 0                         | 0                         | 0                |
| >2                                                                                                                                                                                   | 0                         | 0                         | 0                |

Number of patients with COPD

exacerbations requiring oral/systemic  
corticosteroids and/or antibiotics (not  
involving hospitalization) in the past 12  
months, n (%)

|    |          |          |                  |
|----|----------|----------|------------------|
| n  | 177      | 271      | 448 <sup>a</sup> |
| 0  | 159 (90) | 236 (87) | 395 (88)         |
| 1  | 13 (7)   | 26 (10)  | 39 (9)           |
| 2  | 4 (2)    | 7 (3)    | 11 (2)           |
| >2 | 1 (<1)   | 2 (<1)   | 3 (<1)           |

Number of patients with COPD

exacerbations requiring hospitalization  
in the past 12 months, n (%)

|    |          |          |                  |
|----|----------|----------|------------------|
| n  | 329      | 468      | 797 <sup>b</sup> |
| 0  | 313 (95) | 456 (97) | 769 (96)         |
| 1  | 14 (4)   | 12 (3)   | 26 (3)           |
| 2  | 2 (<1)   | 0        | 2 (<1)           |
| >2 | 0        | 0        | 0                |

---

**Notes:** Studies AC4115361, DB2115362, HZC114156, SCO100646, SCO100648, and SCO116571 are included; For studies SCO100646, SCO100658, and SCO116571, patients in the full analysis set population are included; <sup>a</sup>Not available for studies SCO100646, SCO100648, and SCO116571; <sup>b</sup>Not available for study SCO116571.

**Abbreviations:** EOS, eosinophil; GOLD, Global Initiative for Chronic Obstructive Lung Disease; FEV<sub>1</sub>, forced expiratory volume in 1 second; COPD, chronic obstructive pulmonary disease.
